# Supplementary material for: Imaging brain cortisol regulation in PTSD with a target for 11β-hydroxysteroid dehydrogenase type 1
Source: JCI journal article supplement (doi:10.1172/jci150452), 2021-10-14

**Supplementary Figure 1:** [ $^{18}\text{F}$ ]AS2471907  $V_T$  across non-primary regions in PTSD and TC groups. A pattern of higher [ $^{18}\text{F}$ ]AS2471907  $V_T$  in PTSD was apparent across remaining brain regions, but not statistically significant across remaining regions or in any individual region. Displayed [ $^{18}\text{F}$ ]AS2471907  $V_T$  values are log-transformed, with group-wise mean indicated by black point. CAU: caudate, PUT: putamen, FC: frontal cortex, INS: insula, OC: occipital cortex, PC: parietal cortex, TC: temporal cortex, CER: cerebellum, THA: thalamus

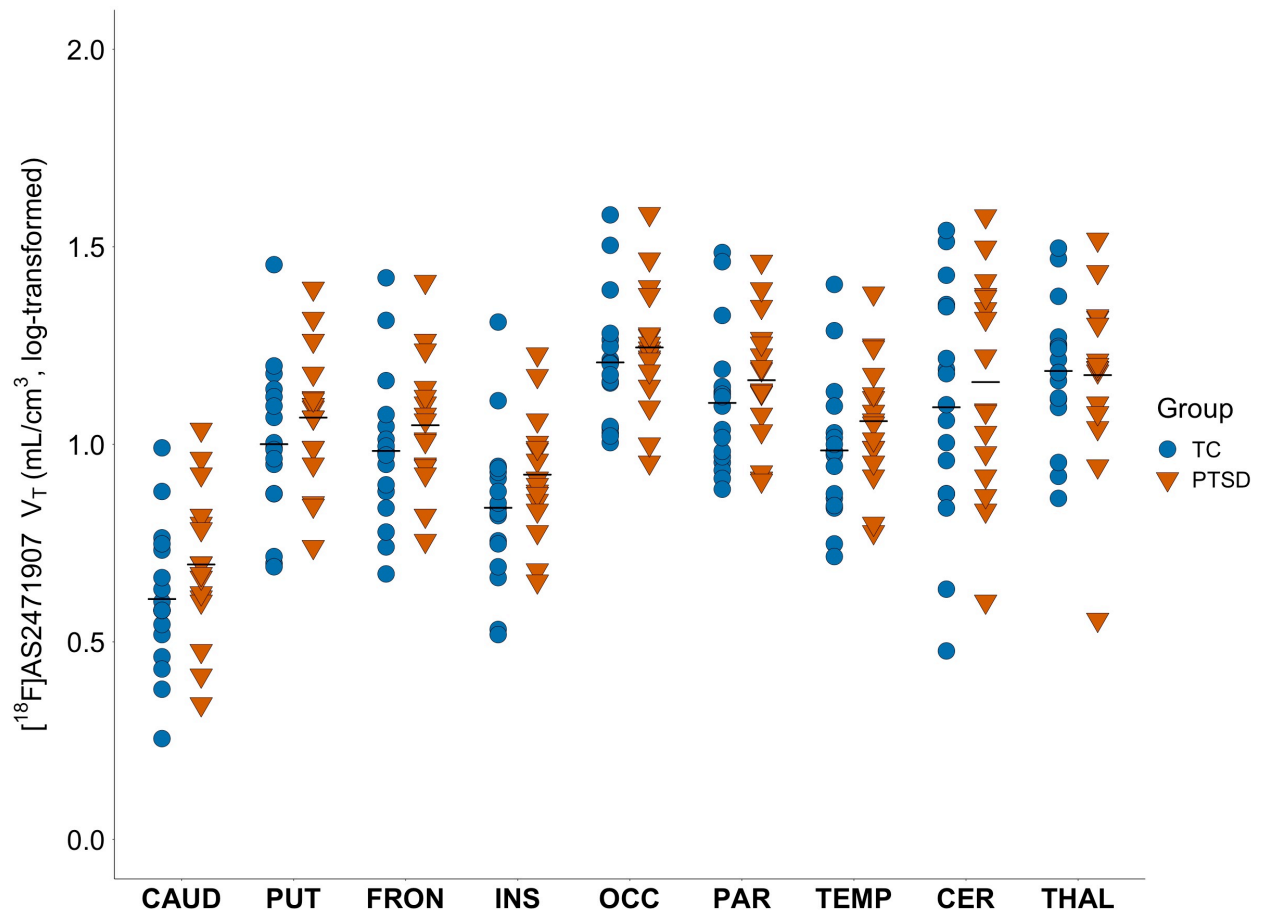

**Supplementary Figure 2:** Relationships of prefrontal-limbic 11 $\beta$ -HSD1 availability with peripheral cortisol. Prefrontal-limbic [ $^{18}\text{F}$ ]AS2471907  $V_T$  was not significantly related to average of cortisol from 0-90 min after radiotracer injection during the PET scan ( $R^2 = 0.026$ ,  $p = 0.37$ ). Displayed [ $^{18}\text{F}$ ]AS2471907  $V_T$  values are log-transformed.

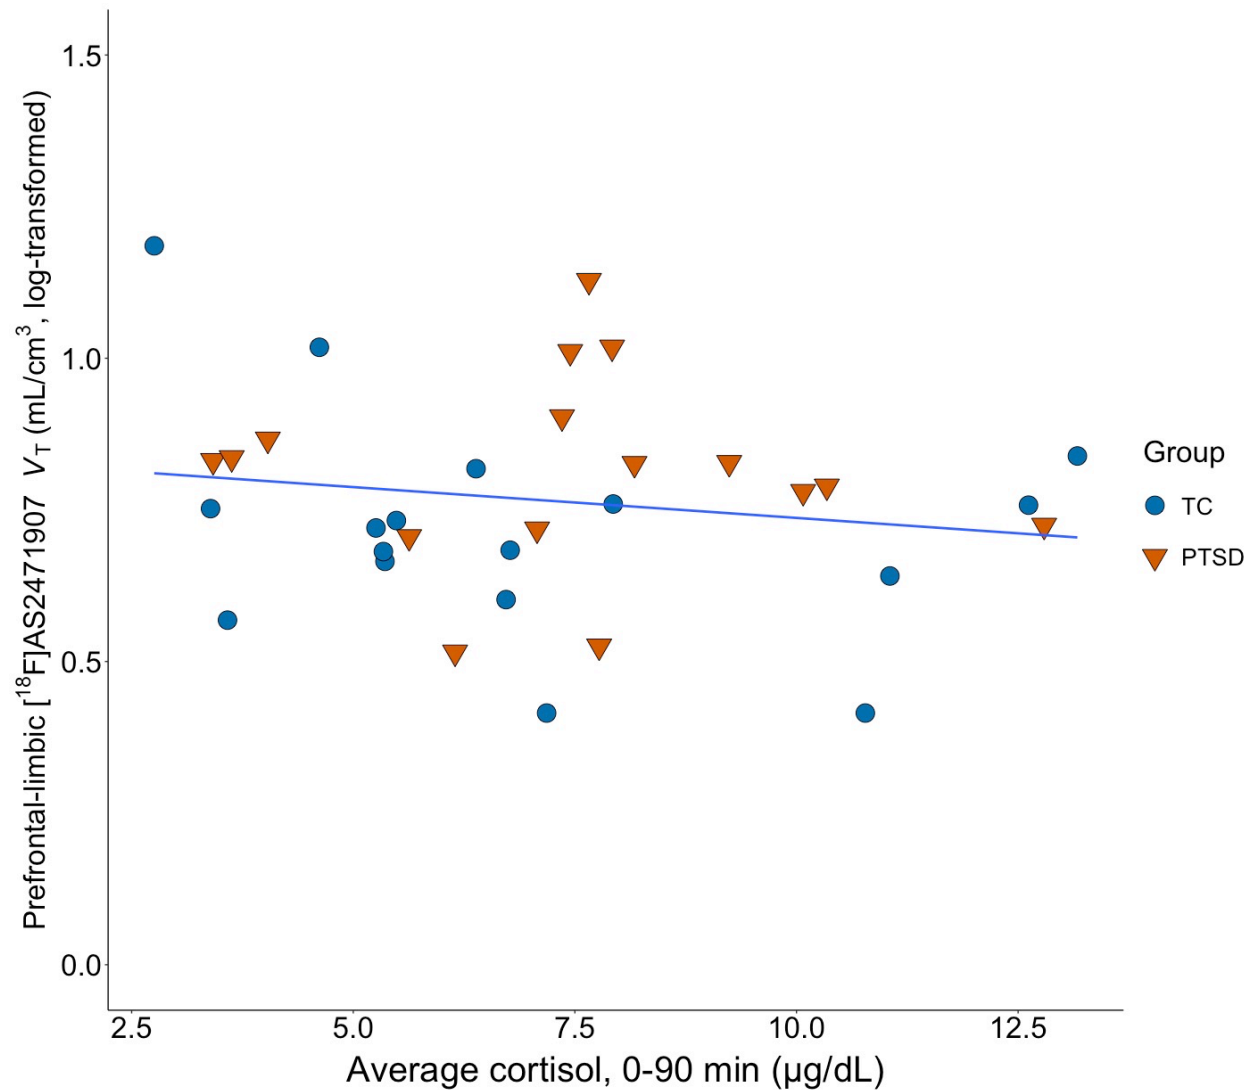

Supplement: sd1 [file 1]
